# Supplementary material for: Interferon regulated gene (IRG) expression-signature in a mouse model of chikungunya virus neurovirulence
Source: Springer Nature journal article supplement (doi:10.1007/s13365-017-0583-3), 2017-10-24
Supplement: MOESM1 [file 15159656]

**Supplementary Table 1: List of primers used for quantitative real-time PCR analysis**

| **Gene symbol** |  | **Primer sequences 5'-3'** |
| --- | --- | --- |
| *mOasl2* | Forward | ACAATTTCCAAAACGAGGTC |
| Reverse | TTCCCATCCCTTTCTTCTTC |
| *mIfi44* | Forward | GACAGATACCAGTTCGATTC |
| Reverse | TTTTCTTGATCTTTGCCACC |
| *mIgtp* | Forward | CCCATGGATTTAGTCACAAAG |
| Reverse | CACCAGCAGTCATAGATTTAG |
| *mUsp18* | Forward | CAAGGAACAGTCTGAAATACAC |
| Reverse | CACAGTAATGACCAAAGTCAG |
| *mIfit1* | Forward | AGAACAGCTACCACCTTTAC |
| Reverse | TTCTTGATGTCAAGGAACTG |
| *mOas1g* | Forward | ACCAACTGTGTAAGGAGAAG |
| Reverse | CTGATAATTGATGACCAGTTCC |
| *mLy6a* | Forward | GAGAGGAAGTTTTATCTGTGC |
| Reverse | TCTCAAATGGGACTCCATAG |
| *mGbp10* | Forward | CTAACCGGAAGTGTTTTGTC |
| Reverse | CAGAATCCCTAGTTTATTCCC |
| *mMnda* | Forward | AGAAATATCCAGGAAGGCTC |
| Reverse | CTCTTCCATCATGTTAGCAATC |
| *mRtp4* | Forward | ATTTCAAGAACTGATGCAGG |
| Reverse | ATCTGGAACACTGGAACC |
| *mGbp4* | Forward | AGCTAACGAAGGAACAAAAG |
| Reverse | GATGTTATGTCCCAGTTGATG |
| *mGbp3* | Forward | CTGTTCGAGATTTTGCTCTG |
| Reverse | TGGACTTTGAGATTGTCTCC |
| *mGbp7* | Forward | GAGTGAAGGCAAATCATGTC |
| Reverse | CTGTTTCTGTCTTAGTAGCTC |
| *mDdx60* | Forward | TGAAAATAAAGAAGGCCTGG |
| Reverse | TTCTTTGATTGGTGATGGTG |
| *mStat1* | Forward | TTTGACAGTATGATGAGCAC |
| Reverse | AGCAAATGTGATGCTCTTTC |
| *mβ-actin* | Forward | AGGTGACAGCATTGCTTCTG |
| Reverse | GCTGCCTCAACACCTCAAC |
| *hβ-ACTIN* | Forward | CCGCAAAGACCTGTACGCCAACAC |
| Reverse | GCTGATCCACATCTGCTGGAAGGT |
| *hIFI44* | Forward | CAGAATGGAAACTAGGACTATG |
| Reverse | TCTTCGCATCGAAAAACTTC |
| *hUSP18* | Forward | TGGTTTACACAACATTGGAC |
| Reverse | ATCCTCTTCAATATCCTGGTG |
| *hIFIT1* | Forward | CTGCCTAATTTACAGCAACC |
| Reverse | TGATCCAAGACTCTGTTTTC |
| *hDDX60* | Forward | CATGTTACTCTAGGCACAATC |
| Reverse | TCAAGGAACCATGTTTGTAG |
| *hSTAT1* | Forward | ACCCAATCCAGATGTCTATG |
| Reverse | GAGCCTGATTAAATCTCTGG |
| *hRTP4* | Forward | AACCTGAAAGCTACTCTCTC |
| Reverse | CTCTCTGTTGGTATTGCTTC |
| *hMNDA* | Forward | CAGTGATTCTGTCCTAAACAAG |
| Reverse | GCCTTAATGGATGCTTCTTC |
| *hGBP4* | Forward | GGAATTTTCTCTGTTCCTGG |
| Reverse | TTGCCTTAACTCCTTTTCTG |
| *hGBP3* | Forward | GAATCCGATCAAAATCCTCAC |
| Reverse | TCTTTTTGACTGGTACCTTG |
| *hGBP7* | Forward | AGTGAAGTCTGAAACCAAAG |
| Reverse | TCTTTTCCATATCACCCAGG |
